# Supplementary material for: The ratio of CT attenuation values of the ureter above and below ureteral stones is a useful preoperative factor for predicting impacted ureteral stones
Source: Research Square preprint supplement (doi:10.21203/rs.3.rs-1693060/v1), 2022-05-27
Supplement: Supplementary file 1 [file 07de2352352120e97eb687c6.xlsx]

## Sheet: Sheet1
Table 2. Univariate and multivariate logistic regression analyses of preoperative factors associated with the presence of impacted stone
Variable	Univariate analysis				Multivariate analysis
	OR	95% CI	P value		OR	95% CI	P value
Age	0.98	0.96-1.01	0.39
Male	0.98	0.48-2.00	0.96
BMI	0.98	0.91-1.06	0.74
ECOG PS ≥ 2	0.45	0.17-1.17	0.1
Presence of preoperative stenting	0.59	0.29-1.21	0.15
Stone size	1.04	0.94-1.14	0.41
Stone volume	1	0.99-1.00	0.97
Mean stone density	1	0.99-1.00	0.78
UWT	1.25	1.06-1.48	<0.01		1.2	1.00-1.44	<0.01
UWV	1	0.99-1.00	0.06
Grade of Hydronephrosis ≥ 3	3.33	1.55-7.15	<0.01		3.01	1.29-6.99	<0.01
HU above	0.96	0.93-0.99	0.01
HU below	1.01	0.98-1.04	0.24
HAB ratio	1.41	1.19-1.69	<0.01		1.47	1.18-1.72	<0.01
BMI: body mass index, ECOG PS: Eastern Cooperative Oncology Group Performance Status, UWT: ureteral wall thickness, UWV: ureteral wall volume, HU above: hounsfield unit above, HU below: hounsfield unit above, HAB ratio: hounsfield unit above-below ratio
