# Supplementary material for: The ratio of CT attenuation values of the ureter above and below ureteral stones is a useful preoperative factor for predicting impacted ureteral stones
Source: Research Square preprint supplement (doi:10.21203/rs.3.rs-1693060/v1), 2022-05-27
Supplement: Supplementary file 2 [file 14f86b9aa1625c3d088c2648.xlsx]

## Sheet: Sheet1
Table 1. Comparison of patient characteristics, stone parameters and surgical outcome according to impaction status
	Impacted	non-impacted	P Value (impacted vs non-impacted)
No. pts	46	125
Age, years	64 (56-77)	68 (59-77)	0.2
Male, n (%)	30 (65.2)	82 (65.6)	0.96
BMI, kg/m2	23.5 (21.0-27.2)	23.5 (21.3-27.3)	0.98
ECOG PS ≧2, n (%)	6 (13.0)	31 (24.8)	0.08
Presence of preoperative stenting, n (%)	15 (32.6)	56 (44.8)	0.14
Stone size, mm	7.2 (5.6-10.2)	6.6 (5.1-8.5)	0.18
Stone volume, mm3	322 (168-532)	262 (166-453)	0.3
Mean stone density, HU	382 (274-507)	395 (283-467)	0.85
UWT, mm	4.26 (2.66-6.05)	3.28 (2.36-4.25)	<0.01
UWV, mm3	975 (636-1597)	819 (489-1247)	0.04
Stone location, n (%)			0.05
Proximal	31 (67.4)	69 (55.2)
Middle	7 (15.2)	12 (9.6)
Distal	8 (17.4)	44 (35.2)
Grade of Hydronephrosis, n (%)			<0.01
0	3 (6.5)	18 (14.4)
1	0 (0)	8 (6.4)
2	8 (17.4)	38 (30.4)
3	30 (65.2)	52 (41.6)
4	5 (10.9)	9 (7.2)
HU above, HU	12 (4-20)	16 (10-27)	<0.01
HU below, HU	28 (20-34)	23 (15-32)	0.05
HAB ratio	2.18 (1.24-6.21)	1.46 (0.89-2.50)	<0.01
Operation time, min	84 (55-118)	64 (44-95)	<0.01
Ureteral injury, n (%)	8 (17.4)	3 (2.4)	<0.01
Stone free, n (%)	40 (87.0)	111 (88.8)	0.74
*Continuous variables are shown in "median (quartile)" form. BMI: body mass index, ECOG PS: Eastern Cooperative Oncology Group Performance Status, UWT: ureteral wall thickness, UWV: ureteral wall volume, HU above: hounsfield unit above, HU below: hounsfield unit above, HAB ratio: hounsfield unit above-below ratio
